# Supplementary material for: Surprise floods: the role of our imagination in preparing for disasters
Source: Copernicus journal article supplement (doi:10.5194/nhess-24-2633-2024), 2024-08-01

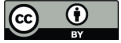

*Supplement of*

## **Surprise floods: the role of our imagination in preparing for disasters**

**Joy Ommer et al.**

*Correspondence to:* Joy Ommer (j.ommer@pgr.reading.ac.uk)

The copyright of individual parts of the supplement might differ from the article licence.

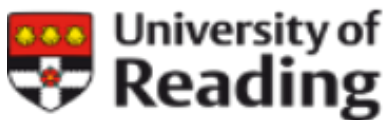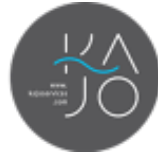

# Sharing experiences and opinions on the flood event in Germany in 2021

First of all, I would like to thank you for your participation in this survey and if you experienced flooding, I wish to express my deepest sympathy for you and your family.

The aim of this survey is to get an insight into your experiences of the flood event in Germany in 2021 which constitutes the first half of the questionnaire and to hear your opinion on the flood event in the second half of the questionnaire.

This survey invites everyone at the age of 18 years and older who has indirectly (e.g., through family or work) or directly experienced flooding last year. Flooding may have been caused by heavy rain, rivers exceeding their banks, high groundwater levels, or by overflowing drainage systems.

Further information:

The questionnaire includes 26 questions and it will take about 10-15 minutes.

The participation is anonymous and voluntary. If you feel that the questions cause sadness or some kind of distress, you can withdraw from the survey at any time.

Please, complete the survey in one go as information you enter will not be saved when you close the window.

Questions marked with \* are mandatory questions.

The data collected within this survey will be stored securely and can be made available in an anonymised format.

This survey is part of my PhD in which I focus on disaster risk reduction. As part of my PhD, I am looking at different risk reduction measures such as nature-based solutions but also at citizens' awareness of risks, their self-preparedness, and risk communication. I am a PhD student at the University of Reading (UK) and work for KAJO a company involved in European projects on disaster risk reduction.

For questions or to withdraw your participation, you can contact myself (Joy Ommer) via email (j.ommer@pgr.reading.ac.uk).

In case, you feel like needing advise or support to cope with your experiences from the flood event, you can contact social advisories (e.g., Stiftungsfamilie).

\* Required

## Survey Consent

### 1. I understand that \*

- my participation is anonymous and voluntary.
- the data collected from me in this study will be preserved and that I have the right to ask for a copy of my data.
- the information provided can be made available in an anonymised way, so that they can be consulted and re-used by others.

## Local flooding

2. Did you experience flooding during July 2021? (You may select more than one option) \*

- Yes, my home was affected by flooding
- Yes, my family/friend/neighbor was affected by flooding and I helped them/him/her
- My business was affected by the floods
- Yes, I experienced flooding in my everyday life
- Yes, I was on holiday in an area that was affected by flooding
- My home/family was affected but I was away (e.g., on holiday)
- No, I did not experience any flooding even though it was forecasted for my village/city
- No, I did not experience any flooding directly but I worked in humanitarian response
- No, I did not experience any flooding and it was also not forecasted (if you select this option you can proceed directly to question 16)
- 

Other

### 3. Where did the water come from?

- From a small stream
- From a river
- From rising groundwater
- From full sewage systems
- From heavy rain
- Saturated soils

Other

### 4. Are you aware of anything that increased or prevented the flooding in your area?

## Actions

5. How did you react and what did you do when you learnt about potential flooding?

A large, empty rectangular text box with a thin grey border, intended for the user to provide their response to question 5.

6. What actions did you take when the water arrived?

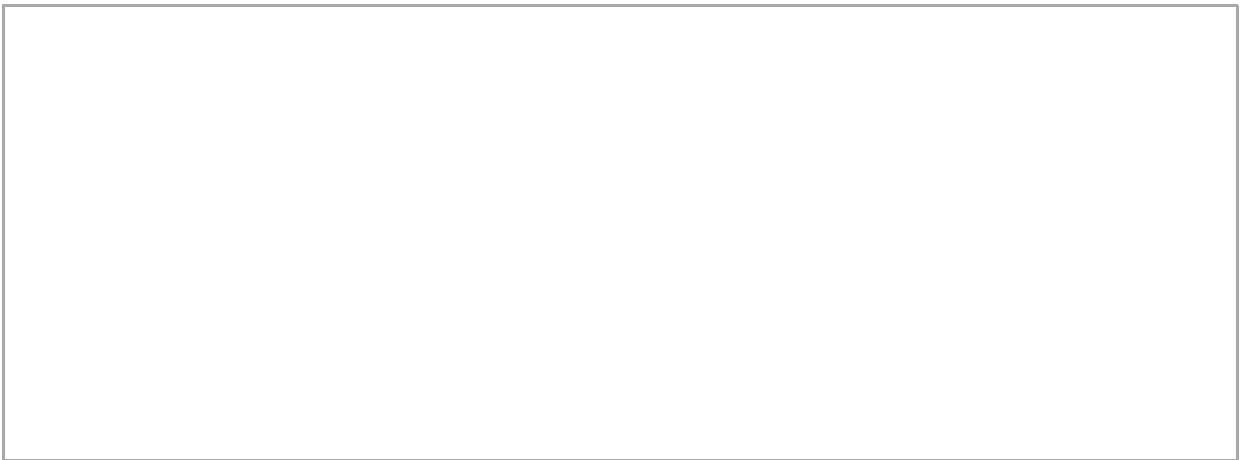A large, empty rectangular text box with a thin grey border, intended for the user to provide their response to question 6.

# Flood preparedness

7. How prepared did/do you feel for flooding?

|                  | Very prepared         | Partly prepared       | Not prepared          | I don't know          |
|------------------|-----------------------|-----------------------|-----------------------|-----------------------|
| Before the flood | <input type="radio"/> | <input type="radio"/> | <input type="radio"/> | <input type="radio"/> |
| During the flood | <input type="radio"/> | <input type="radio"/> | <input type="radio"/> | <input type="radio"/> |
| After the flood  | <input type="radio"/> | <input type="radio"/> | <input type="radio"/> | <input type="radio"/> |
| Now              | <input type="radio"/> | <input type="radio"/> | <input type="radio"/> | <input type="radio"/> |

8. What made/makes you feel (not) prepared?

## Flood information

9. Do you remember when you received information on potential flooding the first time? (How long before the water arrived?)

10. What was the source of information you found/received on (potential) flooding and when did you use this source?

|                              | Before flooding       | During flooding       | After flooding        | All the time          | Never                 |
|------------------------------|-----------------------|-----------------------|-----------------------|-----------------------|-----------------------|
| Daily TV news                | <input type="radio"/> |
| Newspaper                    | <input type="radio"/> |
| Online news/news app         | <input type="radio"/> |
| Weather app                  | <input type="radio"/> |
| Warning app (e.g., NINA)     | <input type="radio"/> |
| Social media (e.g., Twitter) | <input type="radio"/> |
| Friends & Family             | <input type="radio"/> |
| Neighbours                   | <input type="radio"/> |
| Local government             | <input type="radio"/> |
| Sirens                       | <input type="radio"/> |
| Other                        | <input type="radio"/> |



## What you expected and what really happened

11. How likely did you think that flooding would happen when you heard about it for the first time?

- Very likely
- Somewhat likely
- Somewhat unlikely
- Very unlikely

12. Did you imagine that you would be affected by flooding when you first heard about it?

- Yes
- No
- Eventually

13. How serious did you imagine the flooding would be when you first heard about it?

|                      | Serious flooding      | More flooding than usual | Usual flooding        | Minor flooding        | No flooding           |
|----------------------|-----------------------|--------------------------|-----------------------|-----------------------|-----------------------|
| What you imagined    | <input type="radio"/> | <input type="radio"/>    | <input type="radio"/> | <input type="radio"/> | <input type="radio"/> |
| What was the reality | <input type="radio"/> | <input type="radio"/>    | <input type="radio"/> | <input type="radio"/> | <input type="radio"/> |

### 14. How did the following information affect your actions/behaviour/preparedness?

|                                                  | It did not worry me   | It did not have any effect on my actions before and during the flood | It made me unsettled/frightened | I started with preparations | I did not receive this information |
|--------------------------------------------------|-----------------------|----------------------------------------------------------------------|---------------------------------|-----------------------------|------------------------------------|
| The expected amount of rainfall                  | <input type="radio"/> | <input type="radio"/>                                                | <input type="radio"/>           | <input type="radio"/>       | <input type="radio"/>              |
| That river water levels might exceed their banks | <input type="radio"/> | <input type="radio"/>                                                | <input type="radio"/>           | <input type="radio"/>       | <input type="radio"/>              |
| Warning for flooding                             | <input type="radio"/> | <input type="radio"/>                                                | <input type="radio"/>           | <input type="radio"/>       | <input type="radio"/>              |
| Information on potential impact of the rain      | <input type="radio"/> | <input type="radio"/>                                                | <input type="radio"/>           | <input type="radio"/>       | <input type="radio"/>              |
| Information on potential impact of the flood     | <input type="radio"/> | <input type="radio"/>                                                | <input type="radio"/>           | <input type="radio"/>       | <input type="radio"/>              |
| Suggested actions for you                        | <input type="radio"/> | <input type="radio"/>                                                | <input type="radio"/>           | <input type="radio"/>       | <input type="radio"/>              |
| That flooding is likely but not certain          | <input type="radio"/> | <input type="radio"/>                                                | <input type="radio"/>           | <input type="radio"/>       | <input type="radio"/>              |
| Fake news - incorrect news                       | <input type="radio"/> | <input type="radio"/>                                                | <input type="radio"/>           | <input type="radio"/>       | <input type="radio"/>              |

## What would you do different in the future?

15. Imagine you would receive a flood warning now: what would you do different to when you received information on the potential flooding in July?



16. Imagine you would receive a flood warning now: which sources would you trust/rely on? (You may select more than one option) \*

- Daily TV news
- Newspaper
- Online news/news app
- Weather app
- Warning app (e.g., NINA)
- Social media (e.g., Twitter)
- Friends & Family
- Neighbours
- Local government
- Sirens

Other

17. Were you aware of areas that are at risk of flooding in your neighbourhood before July 2021? \*

- Yes
- No
- Not of all

## Your opinion on the flood event

18. How could communication of potential flooding be improved? \*

A large, empty rectangular text box with a thin grey border, intended for the user to provide their answer to question 18.

19. What actions can you take yourself to be better prepared for future flooding?  
\*

A large, empty rectangular text box with a thin grey border, intended for the user to provide their answer to question 19.

20. In your opinion, which issues arose during the flooding in July 2021?

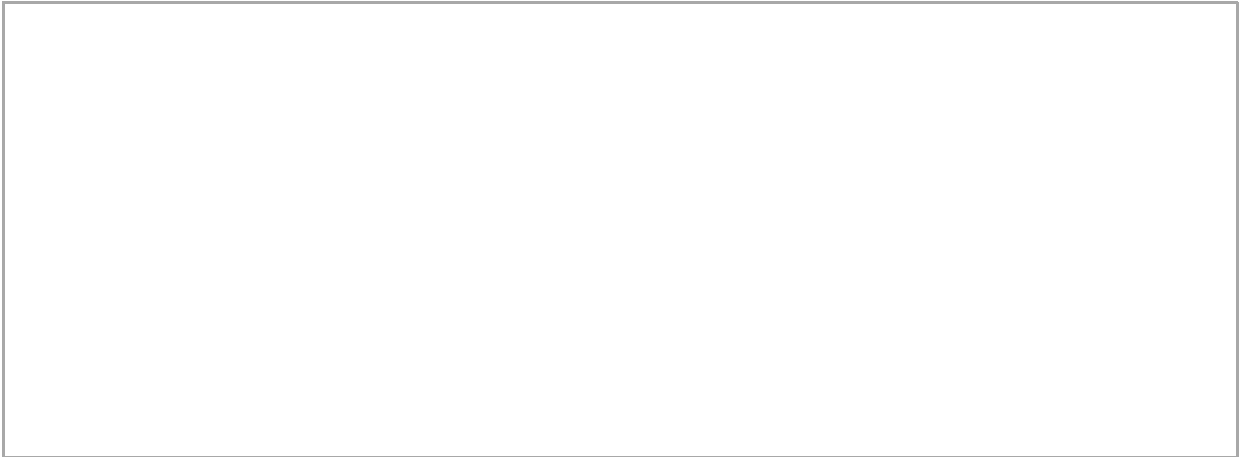A large, empty rectangular text box with a thin grey border, intended for the user to provide their answer to question 20.

21. How could these issues be prevented?

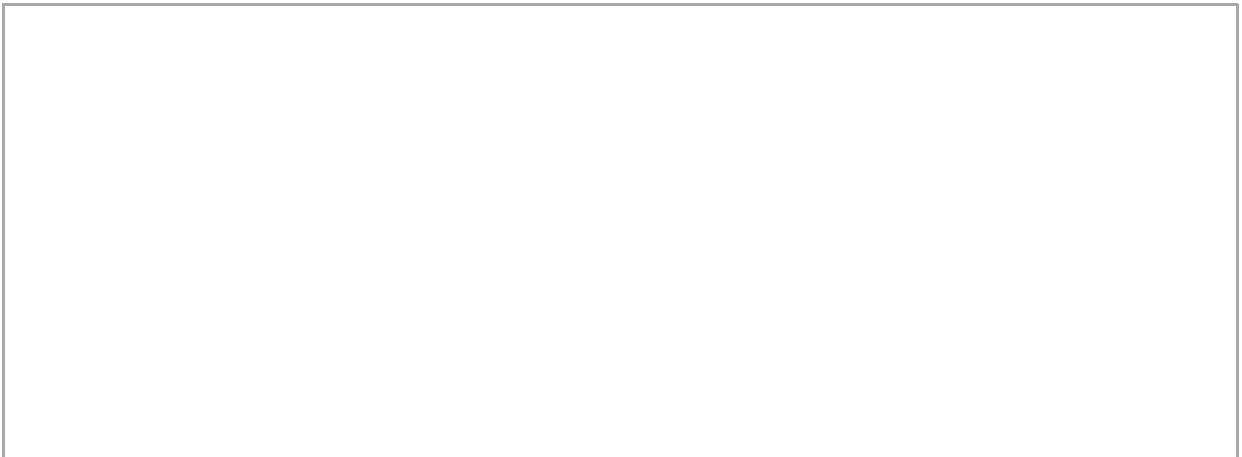A large, empty rectangular text box with a thin grey border, intended for the user to provide their answer to question 21.

22. What do you expect from your local/regional/national government before/during/after disasters like flooding?

23. Would you like to be more involved in \*

- actions for flood risk reduction
- decisions on climate change (incl. flooding and other natural hazards)
- disaster management (e.g., response to flooding)
- warning dissemination
- awareness raising on potential future risks
- I don't want to be involved in anything

Other

## Final Questions

24. Please, enter your postcode \*

25. Please, select your age group \*

- 18-24 years
- 25-54 years
- 55-64 years
- 65 and above
- Prefer not to say

26. Where do you live? \*

- In my own house
- In my own flat
- In a rented flat
- In a rented house
- I live with my parents/others
- Prefer not to say

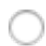

Other



# Thank you for your participation!

If you have any questions, comments, or similar you can contact Joy Ommer via email [j.ommer@pgr.reading.ac.uk](mailto:j.ommer@pgr.reading.ac.uk)

---

2/17/2022

This content is neither created nor endorsed by Microsoft. The data you submit will be sent to the form owner.

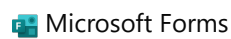

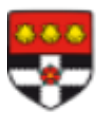

University of  
Reading



# Erfahrungs- und Meinungsaustausch zum Hochwasserereignis in Deutschland im Juli 2021

Zunächst möchte ich Ihnen für Ihre Teilnahme an dieser Umfrage danken und Ihnen und Ihrer Familie mein Mitgefühl aussprechen, falls Sie vom Hochwasser oder anderweitigen Überschwemmungen betroffen waren.

Mit dieser Umfrage möchte ich einen Einblick in Ihre Erfahrungen mit dem Starkregen- und Hochwasserereignis in Deutschland im Juli 2021 erhalten, um zukünftige Katastrophen zu minimieren. Dies wird in der ersten Hälfte des Fragebogens thematisiert. In der zweiten Hälfte des Fragebogens, erfragen ich Ihre persönliche Meinung zum Management während des Ereignisses.

Eingeladen zu dieser Umfrage sind alle ab 18 Jahren, die im vergangenen Jahr indirekt (z. B. durch Familie oder Beruf) oder direkt von Überschwemmungen betroffen waren. Überschwemmungen können durch starke Regenfälle, über die Ufer tretende Flüsse, hohe Grundwasserstände oder überlaufende Abwasserkanäle verursacht worden sein.

Weitere Informationen:

Der Fragebogen enthält 26 Fragen und das Ausfüllen des Fragebogens dauert etwa 15 Minuten.

Die Teilnahme ist anonym, vertraulich und freiwillig.

Sie können Ihre Teilnahme (auch nach der Abgabe) jederzeit abbrechen, besonders, wenn diese bei Ihnen Kummer oder Stress auslöst.

Bitte beachten Sie, dass die von Ihnen eingegebenen Informationen nicht gespeichert werden, wenn Sie das Fenster vor Absendung schließen.

Mit \* markierte Fragen sind Pflichtfragen.

Die Daten, die bei dieser Umfrage erhoben werden, werden gesichert aufbewahrt und können anonymisiert zur Verfügung gestellt werden, um das Katastrophenmanagement zu

verbessern.

Diese Umfrage ist Teil meiner Doktorarbeit zum Thema Katastrophenminimierung. Ich beschäftige mich mit verschiedenen Teilbereichen, wie der Minimierung von Katastrophen durch naturbasierten Lösungen, der Verbesserung von Kommunikation von Warnungen und der Bewusstseinsbildung von zukünftigen Risiken. Ich komme ursprünglich aus dem Bergischen Land und promovieren jetzt an der Universität in Reading in England und arbeite für KAJO in europäischen Projekten zur Katastrophenminimierung.

Bei Fragen oder zum Widerruf Ihrer Teilnahme können Sie sich gerne an mich (Joy Ommer) per Email (j.ommer@pgr.reading.ac.uk) wenden.

\* Required

## Zustimmung zur Umfrage

### 1. Ich habe verstanden, dass \*

- meine Teilnahme anonym und freiwillig ist.
- die von mir in dieser Studie erhobenen Daten aufbewahrt werden und dass ich das Recht habe, eine Kopie meiner Daten anzufordern.
- die bereitgestellten Informationen anonymisiert zur Verfügung gestellt werden können, damit sie von anderen eingesehen und weiterverwendet werden können.

## Das Hochwasser

2. Haben Sie im Juli 2021 Überschwemmungen erlebt? (Sie können mehr als eine Antwort auswählen) \*

- Ja, mein Haus/meine Wohnung war von Überschwemmungen betroffen
- Ja, meine Familie/Freunde/Nachbarn waren von Überschwemmungen betroffen und ich habe ihnen geholfen
- Mein Unternehmen wurde überschwemmt
- Ja, die Überschwemmungen haben meinen Alltag betroffen
- Ja, ich war zu der Zeit im Urlaub in einer Gegend die von Überschwemmungen betroffen war
- Ja, mein Zuhause/meine Familie war betroffen, aber ich war zu dieser Zeit nicht in der Region
- Nein, ich war nicht von Überschwemmungen betroffen, obwohl es vorhergesagt war
- Nein, ich war nicht von Überschwemmungen betroffen, aber ich war als HelferIn/Helfer aktiv
- Nein, ich habe keine Überschwemmungen erlebt und es wurde auch nicht vorhergesagt. Wenn Sie diese Option auswählen, können Sie direkt mit Frage 16 weitermachen
- 

Other

### 3. Woher kam das Wasser?

- Von einem Bach
- Von einem Fluss
- Steigendes Grundwasser
- Überlaufender Abwasserkanal
- Starke Regenfälle
- Gesättigte Bodenfläche

Other

### 4. Ist Ihnen etwas bekannt, was die Überschwemmungen in Ihrer Gegend verstärkt oder reduziert hat?

## Was wurde getan

5. Wie haben Sie reagiert und was haben Sie getan, als Sie von möglichen Überschwemmungen erfahren haben?

A large, empty rectangular text box with a thin black border, intended for the user to provide their response to question 5.

6. Wie haben Sie getan als das Wasser kam?

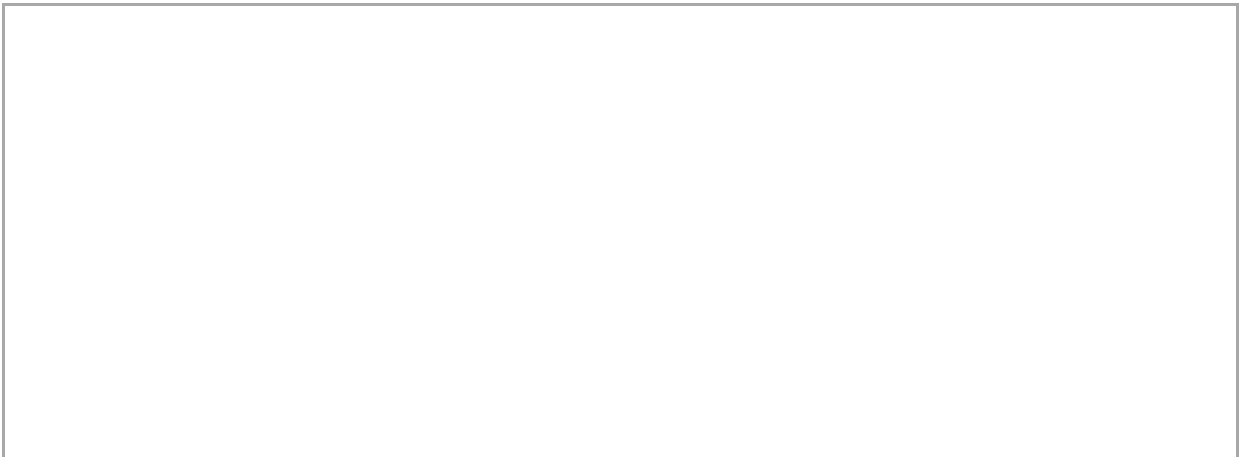A large, empty rectangular text box with a thin black border, intended for the user to provide their response to question 6.

## Eigenvorsorge

7. Wie gut fühlten bzw. fühlen Sie sich auf Überschwemmungen vorbereitet?

|                                     | Sehr gut<br>vorbereitet | Teilweise<br>vorbereitet | Nicht<br>vorbereitet  | Ich weiß es<br>nicht  |
|-------------------------------------|-------------------------|--------------------------|-----------------------|-----------------------|
| Vor<br>den Überschwemmung<br>en     | <input type="radio"/>   | <input type="radio"/>    | <input type="radio"/> | <input type="radio"/> |
| Während<br>den Überschwemmung<br>en | <input type="radio"/>   | <input type="radio"/>    | <input type="radio"/> | <input type="radio"/> |
| Nach<br>den Überschwemmung<br>en    | <input type="radio"/>   | <input type="radio"/>    | <input type="radio"/> | <input type="radio"/> |
| Heute                               | <input type="radio"/>   | <input type="radio"/>    | <input type="radio"/> | <input type="radio"/> |

8. Warum fühlten bzw. fühlen Sie sich (nicht) vorbereitet?

## Warnungen

9. Erinnern Sie sich, wann Sie zum ersten Mal über die Möglichkeit von Überschwemmungen im Juli gehört/gelesen haben und wann das Wasser kam?

10. Woher und wann haben Sie Informationen zu möglichen Überschwemmungen erhalten?

|                                             | Vor dem Hochwasser    | Während dem Hochwasser | Nach dem Hochwasser   | Die ganze Zeit        | Niemals               |
|---------------------------------------------|-----------------------|------------------------|-----------------------|-----------------------|-----------------------|
| TV Nachrichten                              | <input type="radio"/> | <input type="radio"/>  | <input type="radio"/> | <input type="radio"/> | <input type="radio"/> |
| Zeitung                                     | <input type="radio"/> | <input type="radio"/>  | <input type="radio"/> | <input type="radio"/> | <input type="radio"/> |
| Online Nachrichten/<br>Nachrichten App      | <input type="radio"/> | <input type="radio"/>  | <input type="radio"/> | <input type="radio"/> | <input type="radio"/> |
| Wetter App                                  | <input type="radio"/> | <input type="radio"/>  | <input type="radio"/> | <input type="radio"/> | <input type="radio"/> |
| Warn-App (z.B. NINA)                        | <input type="radio"/> | <input type="radio"/>  | <input type="radio"/> | <input type="radio"/> | <input type="radio"/> |
| Soziale Medien (z.B.<br>Twitter, Instagram) | <input type="radio"/> | <input type="radio"/>  | <input type="radio"/> | <input type="radio"/> | <input type="radio"/> |
| Freunde & Verwandte                         | <input type="radio"/> | <input type="radio"/>  | <input type="radio"/> | <input type="radio"/> | <input type="radio"/> |
| Nachbarn                                    | <input type="radio"/> | <input type="radio"/>  | <input type="radio"/> | <input type="radio"/> | <input type="radio"/> |
| Stadt/Gemeinde                              | <input type="radio"/> | <input type="radio"/>  | <input type="radio"/> | <input type="radio"/> | <input type="radio"/> |
| Sirenen                                     | <input type="radio"/> | <input type="radio"/>  | <input type="radio"/> | <input type="radio"/> | <input type="radio"/> |
| Andere Quellen                              | <input type="radio"/> | <input type="radio"/>  | <input type="radio"/> | <input type="radio"/> | <input type="radio"/> |



## Was Sie erwartet haben und was wirklich passiert ist

11. Für wie wahrscheinlich hielten Sie Überschwemmungen in Ihrer Gegend, als Sie zum ersten Mal davon hörten?

- Sehr wahrscheinlich
- Wahrscheinlich
- Eher unwahrscheinlich
- Unwahrscheinlich

12. Haben Sie sich vorgestellt, dass Sie von den Überschwemmungen betroffen sein würden, als Sie zum ersten Mal davon erfahren haben?

- Ja
- Nein
- Eventuell

### 13. Wie haben Sie sich die Überschwemmungen vorgestellt, als Sie zum ersten Mal davon hörten?

|                        | Extremes Hochwasser   | Schlimmer als zuvor   | Wie gewohnt           | Kleine Überschwemmungen | Es würde keine Überschwemmungen geben/ Es gab keine Überschwemmungen |
|------------------------|-----------------------|-----------------------|-----------------------|-------------------------|----------------------------------------------------------------------|
| Was Sie erwartet haben | <input type="radio"/> | <input type="radio"/> | <input type="radio"/> | <input type="radio"/>   | <input type="radio"/>                                                |
| Wie es wirklich war    | <input type="radio"/> | <input type="radio"/> | <input type="radio"/> | <input type="radio"/>   | <input type="radio"/>                                                |

### 14. Wie haben sich die folgenden Informationen auf Ihr Handeln oder Ihr Verhalten ausgewirkt?

|                                                            | Es hat mich nicht beunruhigt | Es hatte keine Auswirkungen auf mein Handeln vor und während der Überschwemmung | Es hat mich verunsichert / verängstigt | Ich habe mit Vorbereitungen begonnen | Ich habe diese Information nicht erhalten |
|------------------------------------------------------------|------------------------------|---------------------------------------------------------------------------------|----------------------------------------|--------------------------------------|-------------------------------------------|
| Die erwartete Regenmenge                                   | <input type="radio"/>        | <input type="radio"/>                                                           | <input type="radio"/>                  | <input type="radio"/>                | <input type="radio"/>                     |
| Flüsse können über die Ufer treten                         | <input type="radio"/>        | <input type="radio"/>                                                           | <input type="radio"/>                  | <input type="radio"/>                | <input type="radio"/>                     |
| Hochwasserwarnung                                          | <input type="radio"/>        | <input type="radio"/>                                                           | <input type="radio"/>                  | <input type="radio"/>                | <input type="radio"/>                     |
| Informationen über mögliche Auswirkungen vom starken Regen | <input type="radio"/>        | <input type="radio"/>                                                           | <input type="radio"/>                  | <input type="radio"/>                | <input type="radio"/>                     |
| Informationen über mögliche Auswirkungen vom Hochwasser    | <input type="radio"/>        | <input type="radio"/>                                                           | <input type="radio"/>                  | <input type="radio"/>                | <input type="radio"/>                     |
| Empfohlene Verhaltensmaßnahmen                             | <input type="radio"/>        | <input type="radio"/>                                                           | <input type="radio"/>                  | <input type="radio"/>                | <input type="radio"/>                     |
| Hochwasser ist möglich aber nicht zu 100%                  | <input type="radio"/>        | <input type="radio"/>                                                           | <input type="radio"/>                  | <input type="radio"/>                | <input type="radio"/>                     |
| Fake news - gefälschte Nachrichten                         | <input type="radio"/>        | <input type="radio"/>                                                           | <input type="radio"/>                  | <input type="radio"/>                | <input type="radio"/>                     |

## Was würden Sie heute anders machen?

15. Stellen Sie sich vor, Sie würden jetzt eine Starkregen- oder Hochwasserwarnung erhalten: Würden Sie anders machen?



16. Stellen Sie sich vor, Sie würden jetzt eine Starkregen- oder Hochwasserwarnung erhalten: Auf welche Quellen würden Sie sich verlassen? (Sie können mehr als eine Option auswählen)

\*

- TV Nachrichten
- Zeitung
- Online Nachrichten/Nachrichten App
- Wetter App
- Warn App (z.B. NINA)
- Soziale Medien (z.B. Twitter, Instagram)
- Freunde & Verwandte
- Nachbarn
- Stadt/Gemeinde
- Sirenen
- 

Other

17. Kannten Sie Überschwemmungsgefährdete Gebiete in Ihrer Nachbarschaft vor Juli 2021? \*

- Ja
- Nein
- Nicht alle

## Ihre Meinung über das Starkregen- und Hochwasserereignis Juli 2021

18. Wie könnte die Kommunikation über mögliche Überschwemmungen verbessert werden? \*

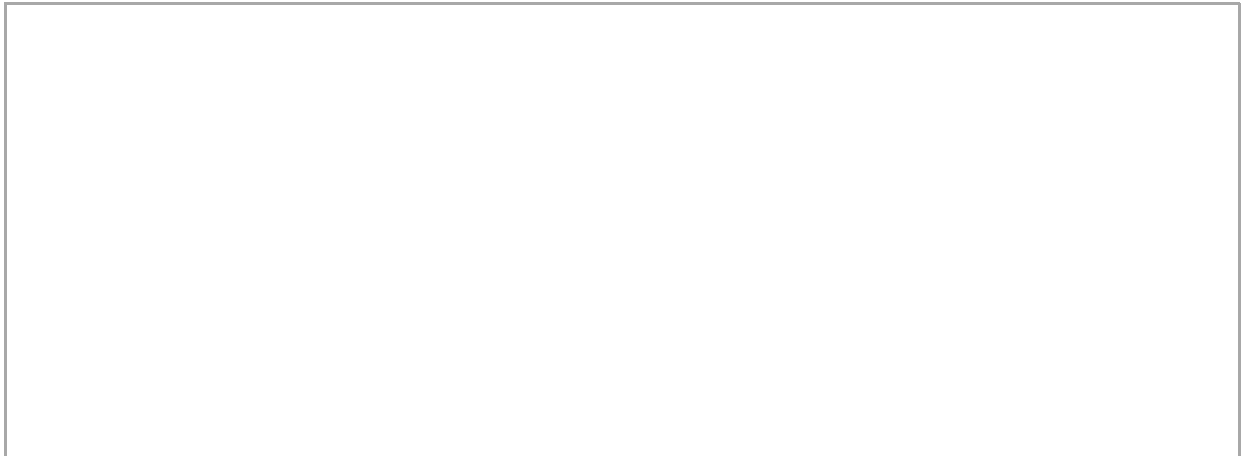A large, empty rectangular text box with a thin grey border, intended for the user to provide their answer to question 18.

19. Welche Maßnahmen können Sie selbst ergreifen, um besser auf Überschwemmungen vorbereitet zu sein? \*

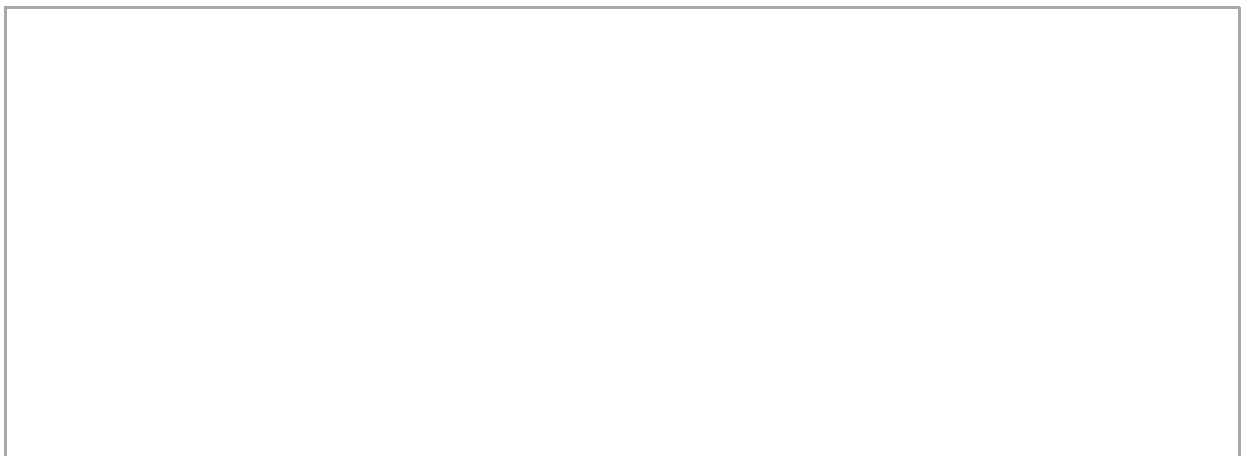A large, empty rectangular text box with a thin grey border, intended for the user to provide their answer to question 19.

20. Welche Probleme traten Ihrer Meinung nach während des Ereignisses im Juli 2021 auf?

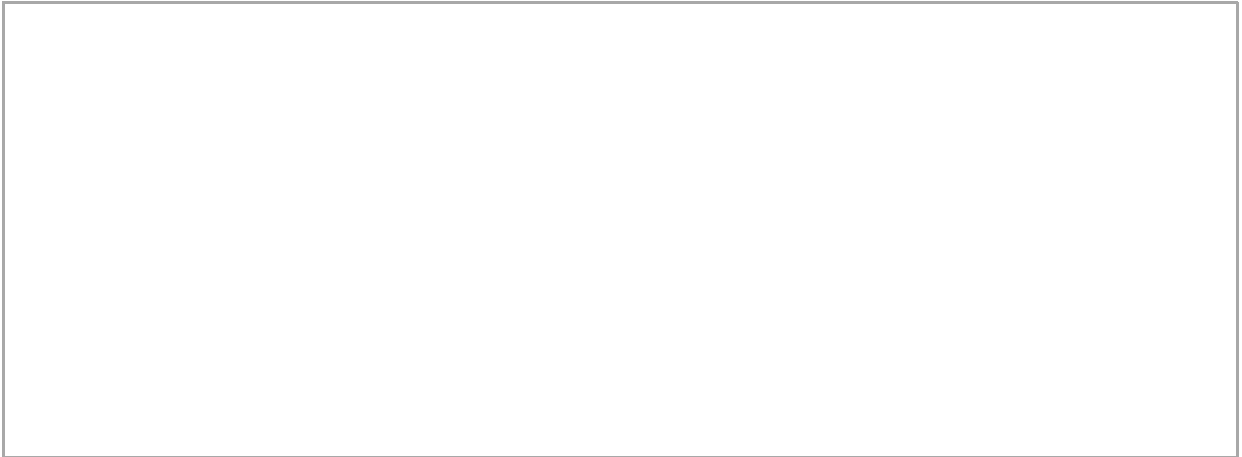A large, empty rectangular text box with a thin grey border, intended for the user to provide their answer to question 20.

21. Wie könnten diese Probleme Ihrer Meinung nach verhindert werden?

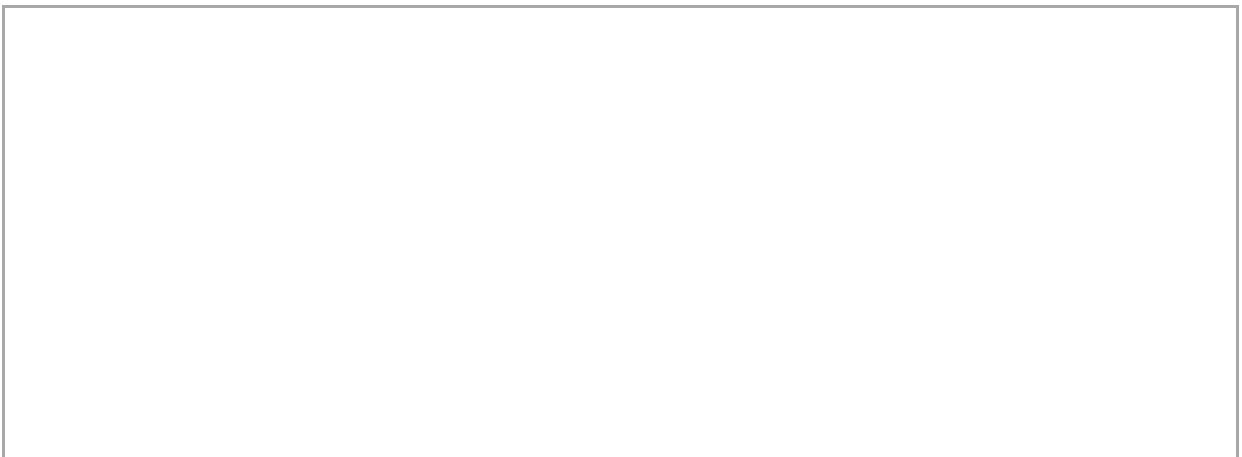A large, empty rectangular text box with a thin grey border, intended for the user to provide their answer to question 21.

22. Was erwarten Sie von der Regierung vor, während und nach Katastrophen wie z.B. das Hochwasserereignis?

23. Wären Sie gerne stärker beteiligt in \*

- Maßnahmen zur Reduzierung des Hochwasserrisikos
- Entscheidungen zum Klimawandel (inkl. Hochwasser und andere Naturgefahren)
- Katastrophenmanagement
- Warnsystemen für Katastrophen
- der Bewusstseinsbildung von Bürgern für potenzielle zukünftige Risiken
- Ich bevorzuge es mich an nichts zu beteiligen

Other



## Letzten Fragen

24. Wie lautet Ihre Postleitzahl? \*

25. In welche Altersgruppe würden Sie sich einordnen? \*

- 18-24 Jahre
- 25-54 Jahre
- 55-64 Jahre
- 65 Jahre und älter
- Ich bevorzuge es mich nicht einzuordnen

26. Wie wohnen Sie? \*

- In meinem eigenen Haus
- In meiner eigenen Wohnung
- In einer gemieteten Wohnung
- In einem gemieteten Haus
- Ich lebe bei meinen Eltern, etc.
- Ich bevorzuge es nicht zu sagen

3/17/2022

This content is neither created nor endorsed by Microsoft. The data you submit will be sent to the form owner.

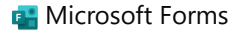

Supplement: Supplementary file 1 [file nhess-24-2633-2024-supplement.pdf]
